# Supplementary material for: Identification of lamin B–regulated chromatin regions based on chromatin landscapes
Source: PubMed Central journal article supplement — Mol Biol Cell. 2015 Jul 15;26(14):2685–97. doi: 10.1091/mbc.E15-04-0210 (PMC4501365; doi:10.1091/mbc.e15-04-0210), 2015-07-15
Supplement: supp_E15-04-0210v1_CombinedSupMats.pdf [file supp_E15-04-0210v1_CombinedSupMats.pdf]

# Supplemental Materials

*Molecular Biology of the Cell*

Zheng et al.

Figure S1

A

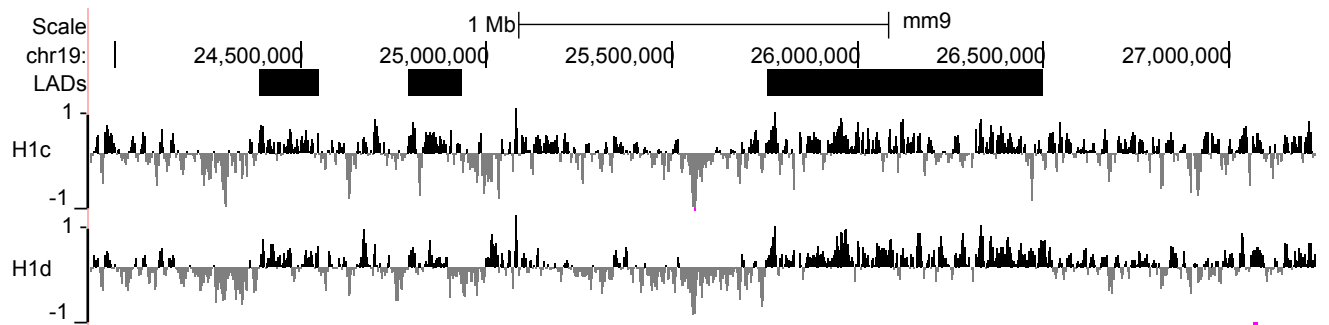

B

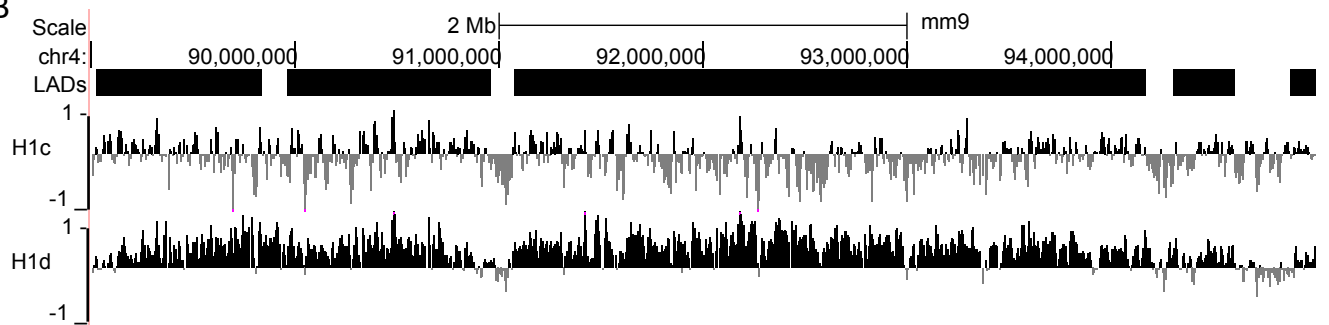

C

|     | Lamin-B1 | H3     | H1c    | H1d    | H3K4me1 | H3K9me3 | H3K27me3 |
|-----|----------|--------|--------|--------|---------|---------|----------|
| PC1 | 0.469    | 0.282  | 0.288  | 0.500  | -0.566  | 0.215   | 0.030    |
| PC2 | 0.122    | -0.512 | -0.070 | 0.031  | 0.095   | 0.593   | 0.596    |
| PC3 | 0.390    | 0.120  | -0.795 | -0.326 | -0.280  | 0.090   | -0.097   |

D

Transition matrix

|   | B     | P     | O     | Y     | G     | R     |
|---|-------|-------|-------|-------|-------|-------|
| B | 0.962 | 0.015 | 0.000 | 0.005 | 0.018 | 0.000 |
| P | 0.010 | 0.990 | 0.000 | 0.000 | 0.000 | 0.000 |
| O | 0.001 | 0.000 | 0.885 | 0.015 | 0.058 | 0.042 |
| Y | 0.014 | 0.000 | 0.018 | 0.922 | 0.022 | 0.024 |
| G | 0.027 | 0.000 | 0.035 | 0.010 | 0.928 | 0.000 |
| R | 0.000 | 0.000 | 0.038 | 0.016 | 0.000 | 0.946 |

Emission parameters

|       | B     |       |       | P     |       |       | O     |       |       | Y     |       |       | G     |       |       | R      |       |       |
|-------|-------|-------|-------|-------|-------|-------|-------|-------|-------|-------|-------|-------|-------|-------|-------|--------|-------|-------|
| delta | 5.58  |       |       | 4.01  |       |       | 4.53  |       |       | 4.04  |       |       | 6.56  |       |       | 8.71   |       |       |
| mu    | 0.70  | -0.43 | 0.08  | 1.30  | -0.32 | 0.00  | -0.42 | -0.92 | -0.91 | -0.37 | -1.48 | -0.53 | 0.29  | -0.74 | -0.39 | -0.44  | -3.16 | -0.98 |
| beta  | -1.40 | 3.38  | -0.28 | -1.20 | 2.33  | 1.76  | -6.22 | 4.89  | 2.16  | -1.15 | 1.57  | 1.46  | -4.41 | 7.17  | -0.18 | -14.78 | 12.90 | 4.99  |
| Gamma | 4.69  | -1.45 | -1.25 | 4.46  | -1.13 | -1.88 | 4.86  | -1.35 | -0.50 | 3.14  | -0.64 | -0.77 | 5.11  | -1.78 | -0.91 | 8.98   | -2.72 | -0.88 |
|       | -1.45 | 5.83  | -0.67 | -1.13 | 4.84  | -0.62 | -1.35 | 5.74  | -0.37 | -0.64 | 4.39  | -0.38 | -1.78 | 6.22  | -0.57 | -2.72  | 10.38 | -0.56 |
|       | -1.25 | -0.67 | 4.24  | -1.88 | -0.62 | 5.47  | -0.50 | -0.37 | 2.30  | -0.77 | -0.38 | 2.76  | -0.91 | -0.57 | 3.35  | -0.88  | -0.56 | 4.53  |

Figure S2

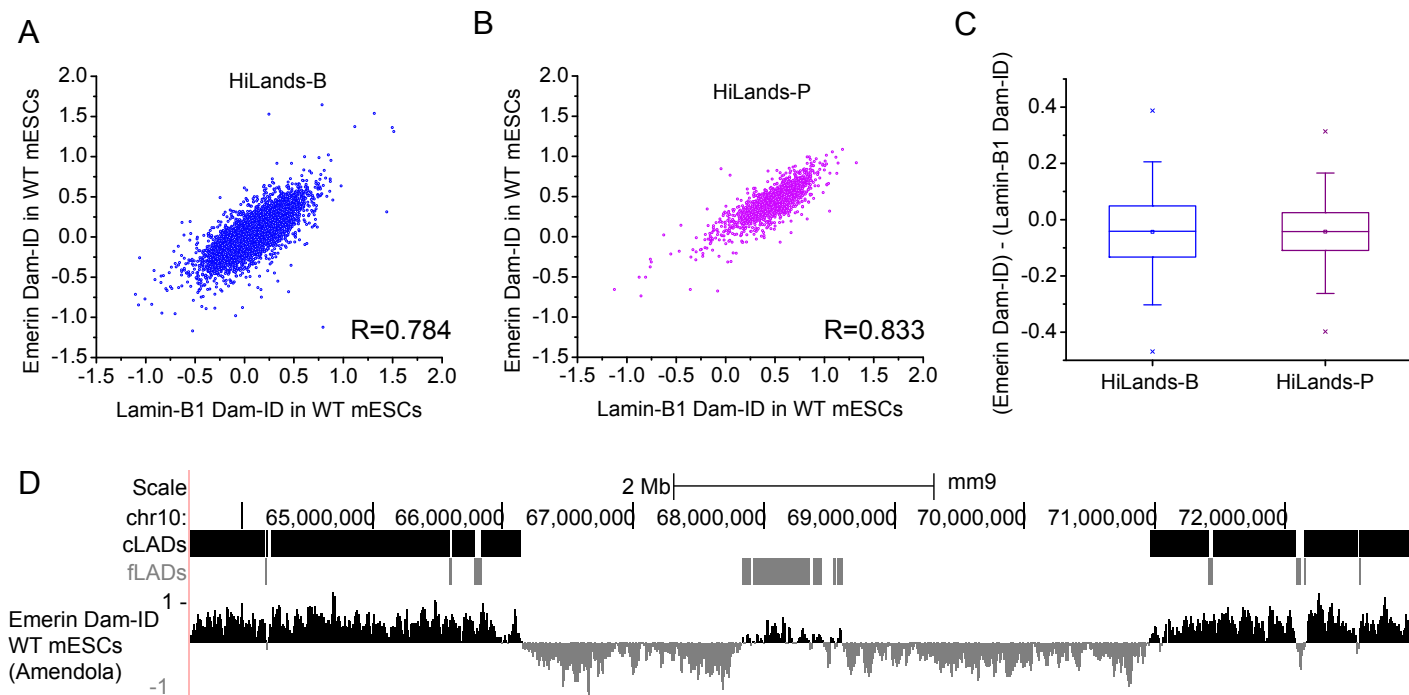

Figure S3

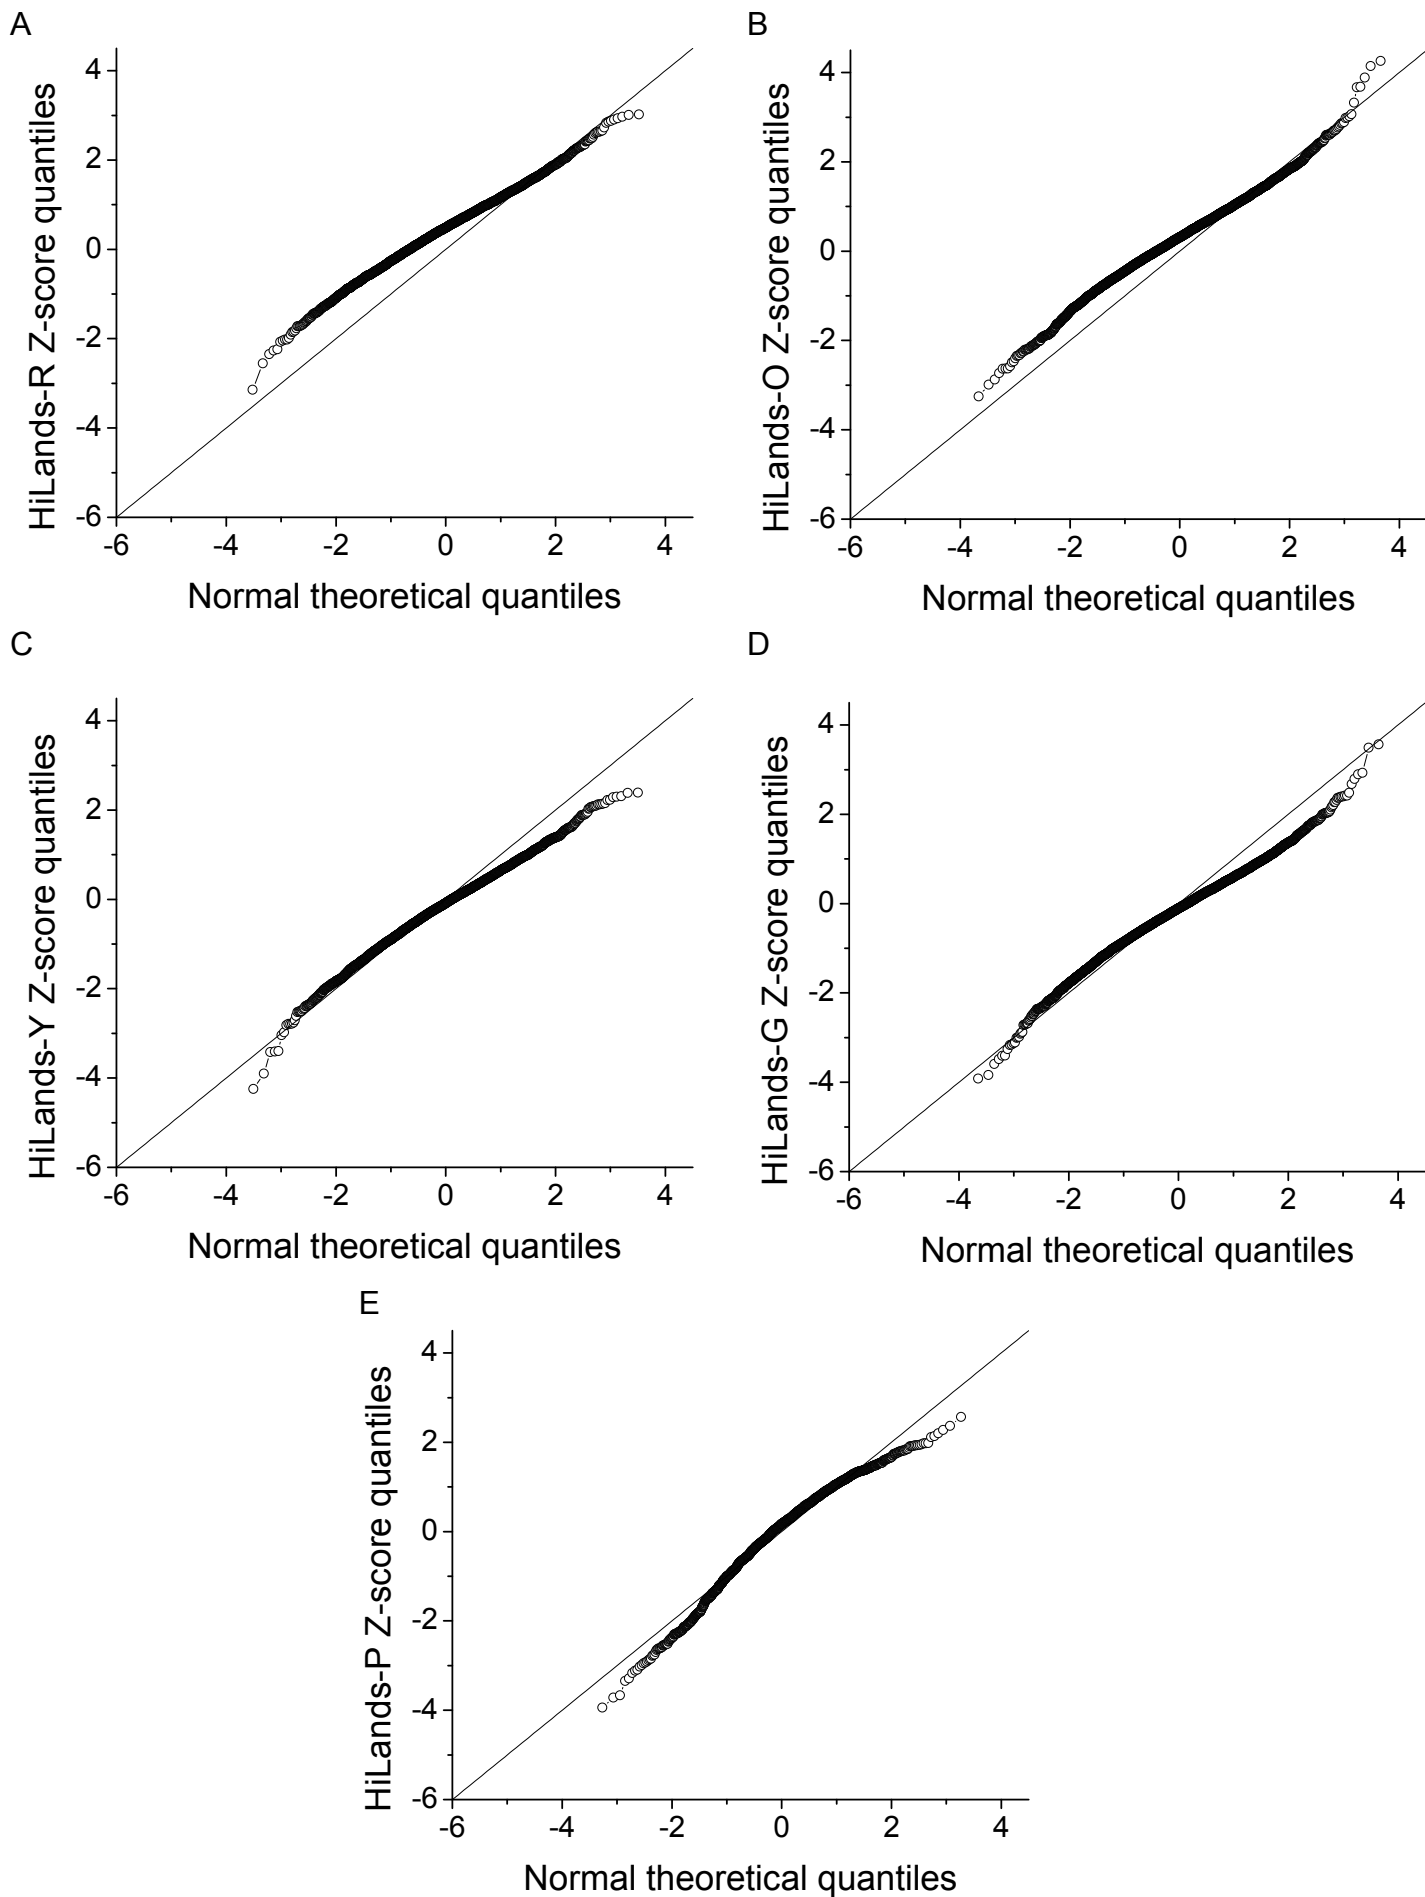

### **Supplementary Figure legends:**

**Supp Figure 1.** Examples of H1c and H1d enrichments on different LADs. (A) LADs showing both H1c and H1d enrichments. (B) LADs enriched of H1d but not H1c. (C) Principal component (PC) analysis parameters. (D) HMM parameters. For the meaning of emission parameters, see the reference (Øigård *et al.*, 2005).

**Supp Figure 2.** (A) Scatter plot comparing emerin Dam-ID and lamin-B1 Dam-ID on HiLands-B. (B) Scatter plot comparing emerin Dam-ID and lamin-B1 Dam-ID on HiLands-P. (C) Box plot showing that the differences between emerin Dam-ID and lamin-B1 Dam-ID are similar in HiLands-B and -P. (D) A genome browser view of a representative region showing fLADs (grey blocks) with lower Dam-ID signal than cLADs (black blocks).

**Supp Figure 3.** QQ-plots for comparison of the Z-scores of (A) HiLands-R, (B) HiLands-O, (C) HiLands-Y, (D) HiLands-(G), and (E) HiLands-P, with the normal distribution. The Z-scores are calculated based on the statistical method described in (Peric-Hupkes *et al.*, 2010).
